# Supplementary material
Source: ML conference proceedings conference paper supplement (https://openaccess.thecvf.com/content/CVPR2026/html/Naseh_When_Anonymity_Breaks_CVPR_2026_paper.html)
Supplement: Supplementary file 1 [file Naseh_When_Anonymity_Breaks_CVPR_2026_supplemental.pdf]

# When Anonymity Breaks: Identifying Models Behind Text-to-Image Leaderboards

## Supplementary Material

### 9. Automated Distinguishability Score Analysis

To better understand trends in distinguishability across visual concepts, we construct a large-scale pipeline using  $\approx 2.5\text{M}$  prompts collected from Midjourney [33]. We perform basic filtering based on length (25–300 characters), language (English), and quality (e.g., requiring  $>75\%$  alphanumeric characters, no excessive repetition, and reasonable word lengths). MinHash deduplication is then applied to remove near-duplicate prompts, resulting in  $\approx 1.4\text{M}$  prompts. We use datatrove [38] to implement these filters.

We embed all prompts using the Qwen3-Embedding-4B model [62] to obtain text representations, and cluster them into 920 semantic groups. For each cluster, we sample 15 prompts and generate 15 images per prompt from 11 representative models (selected from the full set of 22), producing over two million generated samples in total. We then compute distinguishability scores for all prompts and analyze trends across clusters. To interpret clusters, we automatically extract keywords using KeyBERT [44], selecting the top-10 keywords in the 1–3 word range across prompts within each cluster. Each cluster is then assigned a concise label ( $\leq 4$  words) using Llama 3.1 8B Instruct [9], based on the extracted keywords and 10 sampled prompts for context. These LLM-generated labels are propagated to all prompts in the corresponding clusters.

Prompts from stylistically rich or visually constrained categories (e.g. “oil painting,” “anime portrait”) exhibit high distinguishability, whereas generic or ambiguous prompts (e.g. “city street,” “landscape,” “logo”) yield lower separability. We visualize the most and least distinguishable concepts in Fig. 7, and provide representative examples of high- and low-distinguishability prompts, along with their generations from two models, in Figs. 8 and 9.

### 10. Details on Our Countermeasure

**Setup.** We randomly sampled 100 images to evaluate the effectiveness of our adversarial post-processing defense. Following prior work [13], we adopt the same optimization hyperparameters: a learning rate of 0.1 and a contrastive-loss temperature of  $\tau = 0.1$ . For the visual encoder, we use an ensemble of surrogate models listed in Table 8. To test transferability across model families, the target encoder is set to google/siglip2-large-patch16-512, which is distinct from all surrogate models.

---

### Algorithm 1 Adversarial Post-Processing against Deanonimization

---

```
1: Input: T2I models  $\mathcal{C} = \{M_1, \dots, M_n\}$  on the leader-
   board; prompt  $p$ ; visual encoder  $E_v$ ; similarity  $S(\cdot, \cdot)$ ;
   temperature  $\tau$ ; perturbation budget  $\varepsilon$ ; iterations  $T$ ; learn-
   ing rate  $\eta$ ; target image  $I^*$  generated by  $M_i$  using  $p$ 
2: Output: Defended image  $\tilde{I}^*$ 
3:  $S_i \leftarrow \mathcal{C} \setminus \{M_i\}$  ▷ all other models
4:  $e^* \leftarrow E_v(I^*)$ 
5: for each  $M_j \in S_i$  do ▷ same-prompt candidates
6:    $I_j \leftarrow M_j(p)$ 
7:    $e_j \leftarrow E_v(I_j)$ 
8: end for
9:  $j^* \leftarrow \arg \min_{M_j \in S_i} S(e^*, e_j)$  ▷ farthest = least similar
10:  $x^+ \leftarrow I_{j^*}$ ,  $x^- \leftarrow I^*$ 
11:  $\delta^{(0)} \leftarrow 0$ 
12: for  $t = 0$  to  $T - 1$  do
13:    $\tilde{I}^{(t)} \leftarrow I^* + \delta^{(t)}$ 
14:    $z^{(t)} \leftarrow E_v(\tilde{I}^{(t)})$ 
15:    $s^+ \leftarrow S(z^{(t)}, E_v(x^+))$ ,  $s^- \leftarrow S(z^{(t)}, E_v(x^-))$ 
16:    $p^+ \leftarrow \frac{\exp(s^+/\tau)}{\exp(s^+/\tau) + \exp(s^-/\tau)}$ 
17:    $p^- \leftarrow \frac{\exp(s^-/\tau)}{\exp(s^+/\tau) + \exp(s^-/\tau)}$ 
18:    $\mathcal{L}^{(t)} \leftarrow -\log p^+ + \log p^-$  ▷ contrastive loss
19:    $\delta^{(t+1)} \leftarrow \Pi_\varepsilon(I^*, \delta^{(t)} - \eta \nabla_\delta \mathcal{L}^{(t)})$  ▷  $\Pi_\varepsilon(I^*, \cdot)$ 
   projects onto the  $\ell_\infty$ -ball of radius  $\varepsilon$  around  $I^*$ .
20: end for
21:  $\tilde{I}^* \leftarrow I^* + \delta^{(T)}$ 
```

---

**Undoing Post-Processing.** An adversary aware of post-processing by leaderboard maintainers may try to remove the effect of these perturbations. Following Hönig et al. [12], we evaluate two strategies: Gaussian noising, which adds random noise, and noisy upscaling, which uses a diffusion model but incurs higher cost. At  $\varepsilon=2$ , our defense yields a Top-1 accuracy of 0.75; Gaussian noising reduces it to 0.69 and noisy upscaling to 0.72. These results show that post-hoc operations do not significantly weaken our defense, indicating that standard adversarial-example mitigation methods may be ineffective against embedding-space displacement.

**Adversarial examples.** Fig. 10 shows the original image and adversarial examples under different perturbation budgets  $\varepsilon \in \{2, 4, 8\}$ . Larger  $\varepsilon$  yields more visible perturbations but stronger defense performance (see Table 3).

Table 4. Full list of T2I models used in our experiments, along with their provider, image resolution, and the number of inference steps. Where inference-step counts are available on the ArtificialAnalysis methodology page, we adopt those values directly. For models not mentioned there, we use the default values documented on their respective Hugging Face model pages. For OpenAI and Midjourney models we did not explicitly set the number of inference steps and used their internal default generation settings.

| Model                            | Company / Provider | Resolution (W×H) | Inference Steps |
|----------------------------------|--------------------|------------------|-----------------|
| DALL·E 3 HD [2]                  | OpenAI             | 1024×1024        | –               |
| FLUX.1-dev [17]                  | Black Forest Labs  | 1024×1024        | 28              |
| FLUX.1-schnell [17]              | Black Forest Labs  | 1024×1024        | 4               |
| FLUX.1-Krea-dev [17]             | Black Forest Labs  | 1024×1024        | 28              |
| FLUX-1.1-pro                     | Black Forest Labs  | 1024×1024        | 28              |
| flux.1-kontext-pro               | Black Forest Labs  | 1024×1024        | 28              |
| Stable Diffusion v1.5 [43]       | Stability AI       | 512×512          | 50              |
| Stable Diffusion 2.1 [43]        | Stability AI       | 768×768          | 50              |
| Stable Diffusion XL [39]         | Stability AI       | 1024×1024        | 30              |
| SDXL Turbo [39]                  | Stability AI       | 1024×1024        | 4               |
| Stable Diffusion 3.5 Large Turbo | Stability AI       | 1024×1024        | 4               |
| Stable Diffusion 3.5 Large       | Stability AI       | 1024×1024        | 35              |
| Stable Diffusion 3 Medium [8]    | Stability AI       | 1024×1024        | 30              |
| Stable Diffusion 3.5 Medium      | Stability AI       | 1024×1024        | 40              |
| GPT-Image-1                      | OpenAI             | 1024×1024        | –               |
| Midjourney v6 [30]               | Midjourney         | 1024×1024        | –               |
| Lumina 2 [40]                    | Alpha-VLLM         | 1024×1024        | 50              |
| HiDream [3]                      | HiDream.ai         | 1024×1024        | 50              |
| Playground v2.5 [20]             | Playground AI      | 1024×1024        | 50              |
| Playground v2 [20]               | Playground AI      | 1024×1024        | 50              |
| Playground v1                    | Playground AI      | 512×512          | –               |
| Qwen-Image [54]                  | Alibaba            | 1024×1024        | 50              |

Table 5. Mean deanonymization accuracy for each target model. Values are averaged over all prompts and reported as percentages.

| Target Model                     | Mean Accuracy (%) |
|----------------------------------|-------------------|
| DALL·E 3 HD                      | 99.9              |
| SDXL Turbo                       | 99.9              |
| GPT-Image-1                      | 99.8              |
| Playground v2                    | 99.7              |
| HiDream                          | 99.7              |
| Playground v2.5                  | 99.6              |
| FLUX.1-Krea-dev                  | 99.6              |
| Lumina 2                         | 99.5              |
| flux.1-kontext-pro               | 99.5              |
| Playground v1                    | 99.4              |
| Stable Diffusion 3.5 Medium      | 99.3              |
| Stable Diffusion 3 Medium        | 99.2              |
| Stable Diffusion 3.5 Large Turbo | 99.2              |
| Stable Diffusion XL              | 99.1              |
| Midjourney v6                    | 99.0              |
| FLUX.1-schnell                   | 98.9              |
| Stable Diffusion 3.5 Large       | 98.8              |
| Qwen-Image                       | 98.7              |
| Stable Diffusion 2.1             | 98.6              |
| Stable Diffusion v1.5            | 98.3              |
| FLUX-1.1-pro                     | 97.9              |
| FLUX.1-dev                       | 97.8              |



Table 6. Per-model deanonymization performance in the one-vs-rest setting, where the adversary has access only to its target model. Models are sorted in decreasing order of accuracy.

| Target Model                        | Accuracy | FPR   | FNR   | TPR @1% | TPR @5% | ROC-AUC |
|-------------------------------------|----------|-------|-------|---------|---------|---------|
| playground_v2_5                     | 0.986    | 0.003 | 0.292 | 0.871   | 0.988   | 0.993   |
| sdxl_turbo                          | 0.985    | 0.000 | 0.318 | 0.971   | 0.983   | 0.997   |
| playground_v2                       | 0.984    | 0.003 | 0.258 | 0.902   | 0.968   | 0.995   |
| gpt_image_1                         | 0.984    | 0.000 | 0.345 | 0.917   | 1.000   | 0.997   |
| hidream                             | 0.979    | 0.008 | 0.271 | 0.750   | 0.976   | 0.989   |
| stable_diffusion_3_5_large_turbo    | 0.969    | 0.017 | 0.305 | 0.544   | 0.864   | 0.974   |
| dalle3_hd                           | 0.969    | 0.025 | 0.191 | 0.520   | 0.883   | 0.979   |
| flux.1-kontext-pro                  | 0.954    | 0.035 | 0.304 | 0.534   | 0.851   | 0.961   |
| stable_diffusion_3_5_medium         | 0.954    | 0.032 | 0.404 | 0.331   | 0.702   | 0.951   |
| stable_diffusion_3_5_large          | 0.954    | 0.037 | 0.252 | 0.549   | 0.852   | 0.968   |
| stable_diffusion_3_medium_diffusers | 0.953    | 0.037 | 0.307 | 0.300   | 0.730   | 0.957   |
| lumina2                             | 0.944    | 0.044 | 0.381 | 0.178   | 0.651   | 0.922   |
| flux_1_krea_dev                     | 0.943    | 0.042 | 0.291 | 0.340   | 0.810   | 0.950   |
| flux_1_dev                          | 0.932    | 0.051 | 0.399 | 0.213   | 0.623   | 0.930   |
| midjourney_v6                       | 0.931    | 0.059 | 0.276 | 0.229   | 0.707   | 0.939   |
| playground_v1                       | 0.926    | 0.061 | 0.345 | 0.154   | 0.598   | 0.919   |
| flux_1_schnell                      | 0.921    | 0.071 | 0.250 | 0.274   | 0.682   | 0.919   |
| stable_diffusion_xl                 | 0.908    | 0.079 | 0.367 | 0.179   | 0.510   | 0.923   |
| FLUX-1.1-pro                        | 0.896    | 0.092 | 0.318 | 0.260   | 0.557   | 0.915   |
| stable_diffusion_2_1                | 0.876    | 0.116 | 0.272 | 0.177   | 0.466   | 0.891   |
| stable_diffusion_v1_5               | 0.850    | 0.142 | 0.255 | 0.117   | 0.398   | 0.869   |
| qwen_image                          | 0.694    | 0.306 | 0.304 | 0.087   | 0.235   | 0.717   |

Table 7. Deanonymization performance for our method across different image encoders.

| Image Encoder                         | Accuracy (%) |              |              |
|---------------------------------------|--------------|--------------|--------------|
|                                       | Top-1        | Top-2        | Top-3        |
| laion/CLIP-ViT-L-14-DataComp.XL [15]  | 87.86        | 94.71        | 96.29        |
| google/siglip2-large-patch16-512 [51] | 90.36        | 95.79        | 97.29        |
| openai/clip-vit-large-patch14 [41]    | 84.07        | 92.71        | 95.64        |
| laion/CLIP-ViT-bigG-14-laion2B [15]   | <b>90.86</b> | <b>96.14</b> | <b>97.50</b> |

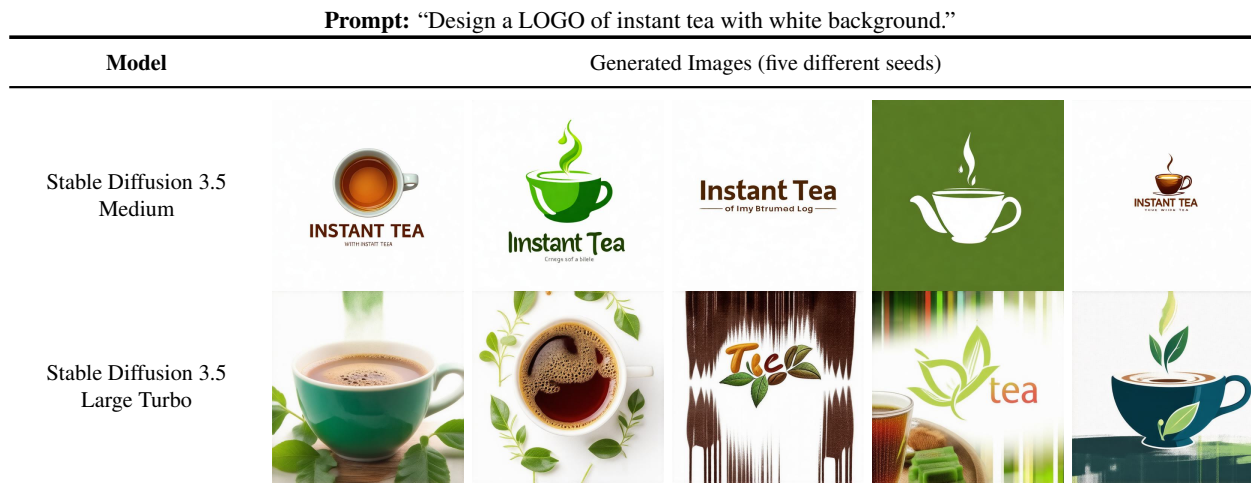

Figure 8. Example of a low-distinguishability prompt with high intra-model variation, showing generations from two models across five seeds.

**Prompt:** “create a painting of a lake surrounded by forest in the winter, foggy weather, snow falling, andre kohn style painting.”

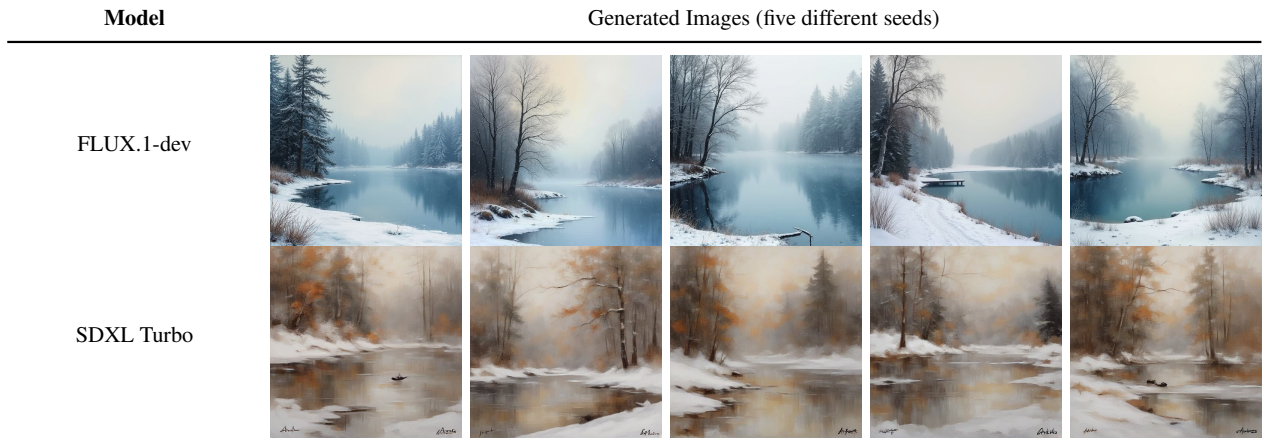

Figure 9. Example of a high-distinguishability prompt with low intra-model variation, showing generations from two models across five seeds.

Table 8. Local encoder ensemble used for adversarial optimization.

| Model                         | Training Dataset   |
|-------------------------------|--------------------|
| ViT-H-14-378-quickgelu        | dfn5b              |
| ViT-H-14-quickgelu            | dfn5b              |
| ViT-SO400M-14-SigLIP-384 [60] | webli              |
| ViT-SO400M-14-SigLIP [60]     | webli              |
| ViT-L-16-SigLIP-384 [60]      | webli              |
| ViT-bigG-14 [15]              | laion2b_s39b_b160k |
| ViT-H-14-CLIPA-336 [22]       | datacomp1b         |
| ViT-H-14-quickgelu            | metaclip_fullcc    |

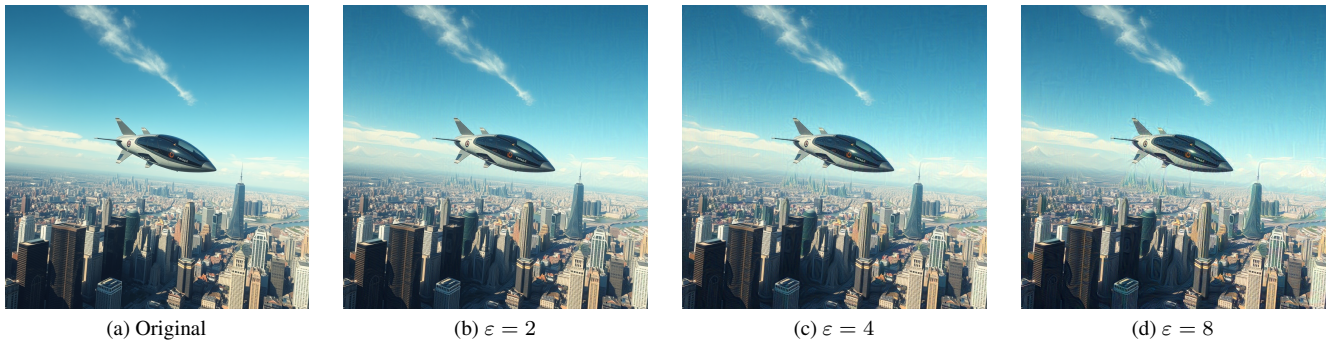

Figure 10. Original image and adversarial examples generated under different perturbation budgets  $\epsilon$ . As expected, visual artifacts are more apparent for larger perturbation budgets.
